# Supplementary material for: A biodegradable bismuth–gadolinium-based nano contrast agent for accurate identification and imaging of renal insufficiency in vivo
Source: Royal Society of Chemistry journal article supplement (doi:10.1039/d1qi00878a), 2021-01-01
Supplement: d1qi00878a1.pdf [file d1qi00878a1.pdf]

Electronic Supplementary Information

**Biodegradable Bismuth–Gadolinium-Based Nano Contrast Agent for  
Accurate Identification and Imaging of Renal Insufficiency In Vivo**

*Jing Zhang,<sup>a</sup> Kang Song,<sup>a</sup> Jing Ping,<sup>a</sup> Jun Du,<sup>a</sup> Yun Sun,<sup>\*b,c,d</sup> Jianping Zhang,<sup>e</sup> Ming  
Qi,<sup>e</sup> Yuqing Miao,<sup>\*a</sup> Yuhao Li,<sup>\*a</sup>*

<sup>a</sup> Institute of Bismuth Science & School of Materials and Chemistry, University of  
Shanghai for Science and Technology, Shanghai 200093, P. R. China

<sup>b</sup> Department of Research and Development & Department of Nuclear Medicine,  
Shanghai Proton and Heavy Ion Center, Fudan University Cancer Hospital, Shanghai  
201321, P. R. China

<sup>c</sup> Shanghai Key Laboratory of Radiation Oncology (20dz2261000), Shanghai 201321,  
P. R. China

<sup>d</sup> Shanghai Engineering Research Center of Proton and Heavy Ion Radiation Therapy,  
Shanghai 201321, P. R. China

<sup>e</sup> Department of Nuclear Medicine, Fudan University Shanghai Cancer Center,  
Shanghai 200032, P. R. China

Corresponding Authors :

Yuhao Li: [yhli@usst.edu.cn](mailto:yhli@usst.edu.cn)

Yun Sun: [yun.sun@sphic.org.cn](mailto:yun.sun@sphic.org.cn)

Yuqing Miao: [yqmiao@usst.edu.cn](mailto:yqmiao@usst.edu.cn)

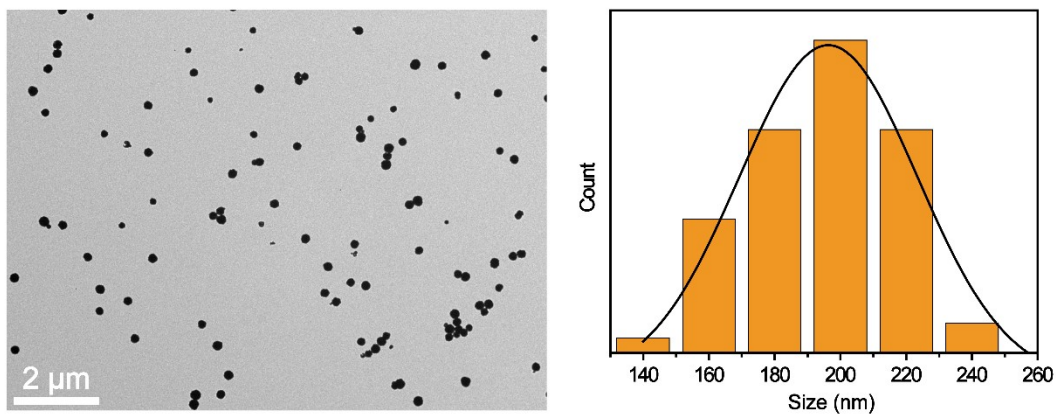

Fig.S1. TEM image of BiGd-PVP (left) and the corresponding size distribution (right).

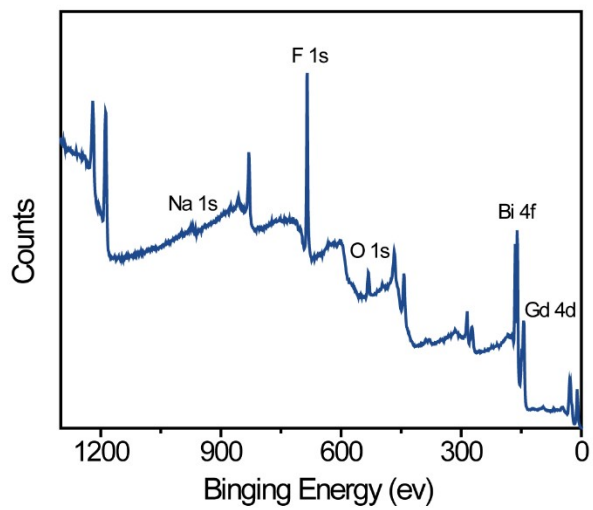

Fig.S2. XPS pattern of BiGd-PVP.

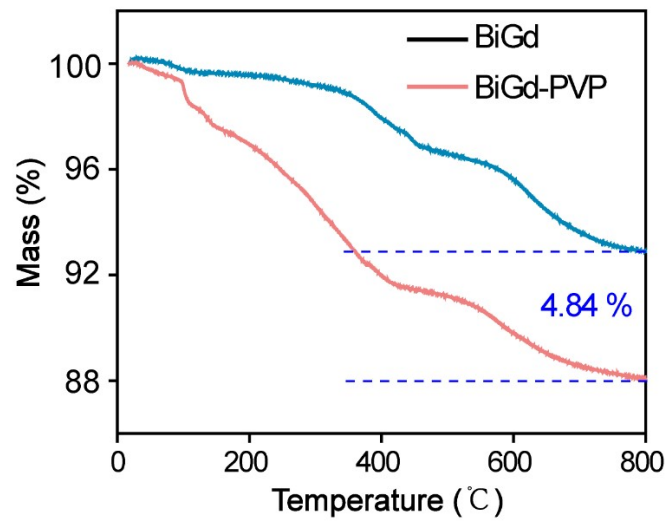

Fig.S3. TG curves of BiGd and BiGd-PVP.

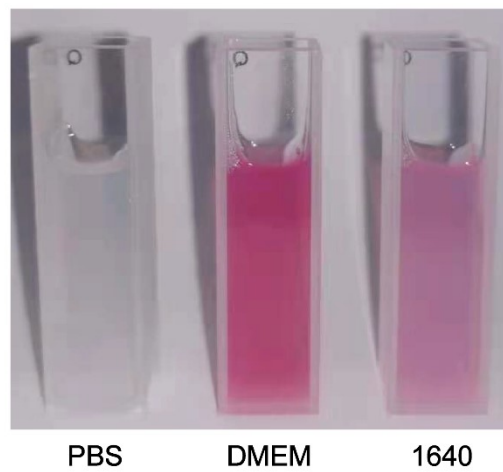

Fig.S4. Digital photos of BiGd-PVP in the different buffer solutions after 7 days (PBS: phosphate buffer saline; DMEM: dulbecco's modified eagle medium; 1640: 1640 culture medium).

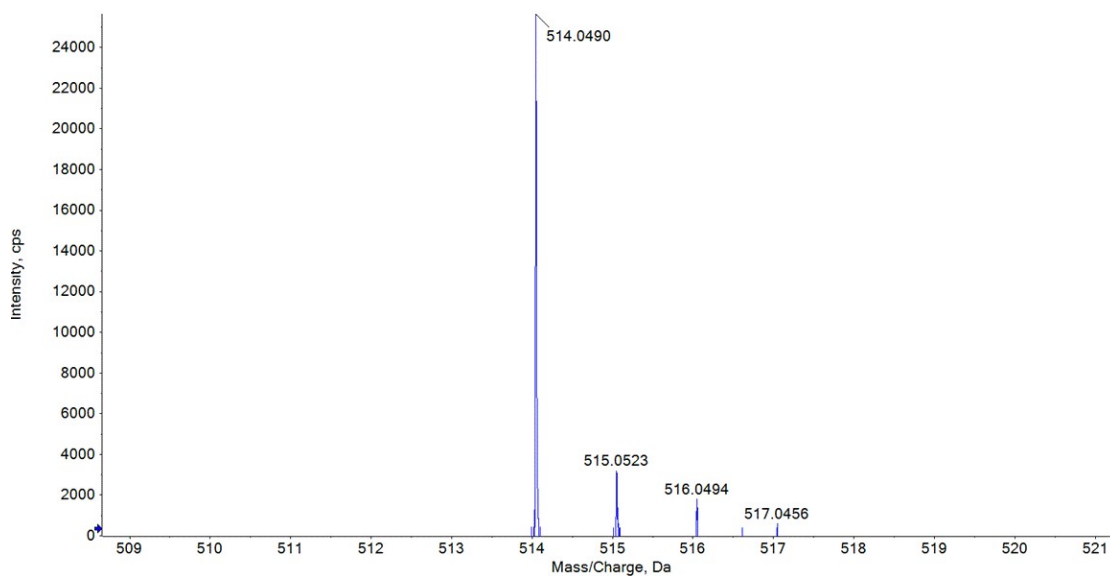

Fig.S5. HR-MS of  $[\text{Bi}(\text{GSH}) - 2\text{H}]^+$ .

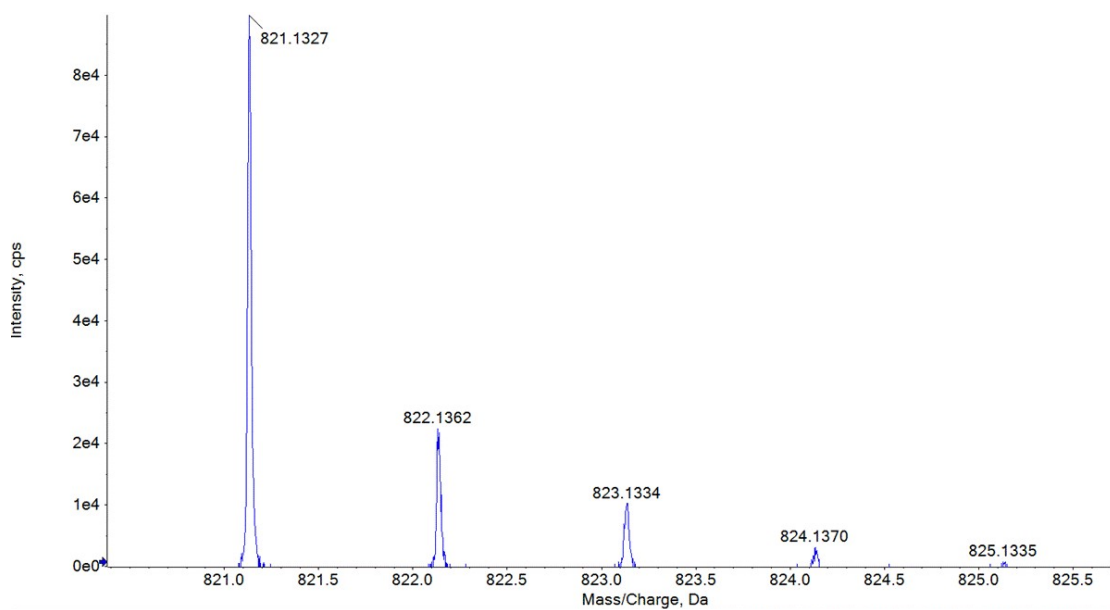

Fig.S6. HR-MS of  $[\text{Bi}(\text{GSH})_2 - 2\text{H}]^+$ .

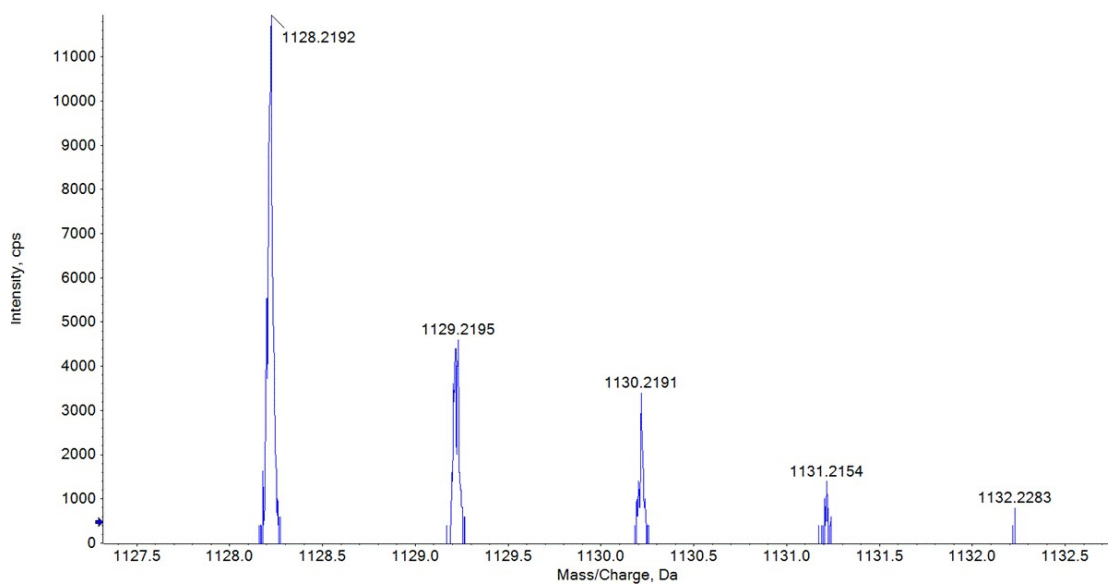

Fig.S7. HR-MS of  $[\text{Bi}(\text{GSH})_3 - 2\text{H}]^+$ .

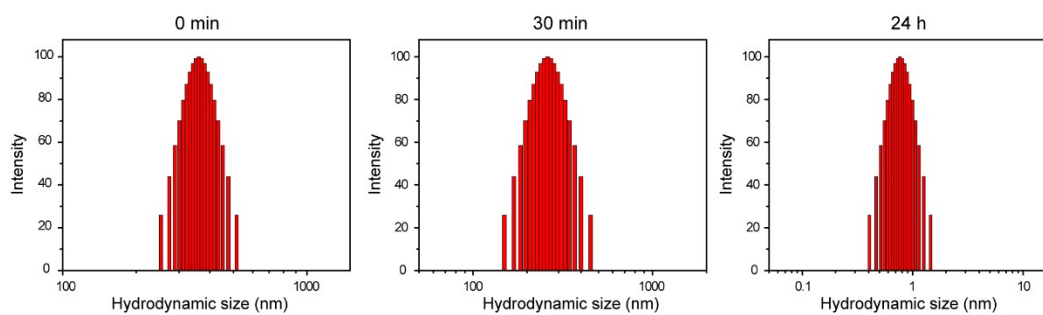

Fig.S8. The hydrodynamic size of BiGd-PVP incubated with GSH for different times.

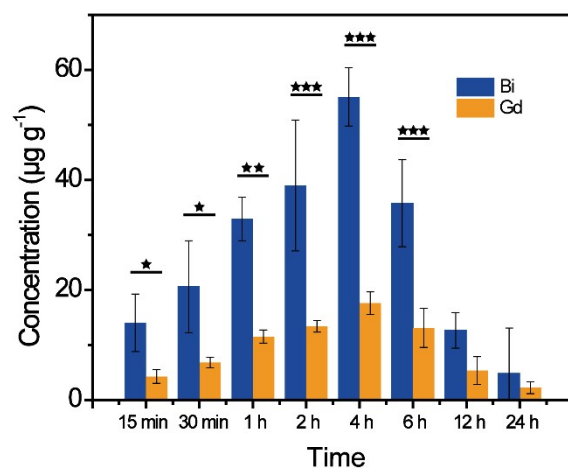

Fig.S9. The corresponding biodistribution curve over time of Bi (in Fig. 4c) and Gd (in Fig. 4d) in the kidney. The statistical analysis was analyzed through Student's t-test (\*P < 0.05, \*\*P < 0.01, and \*\*\*P < 0.001).

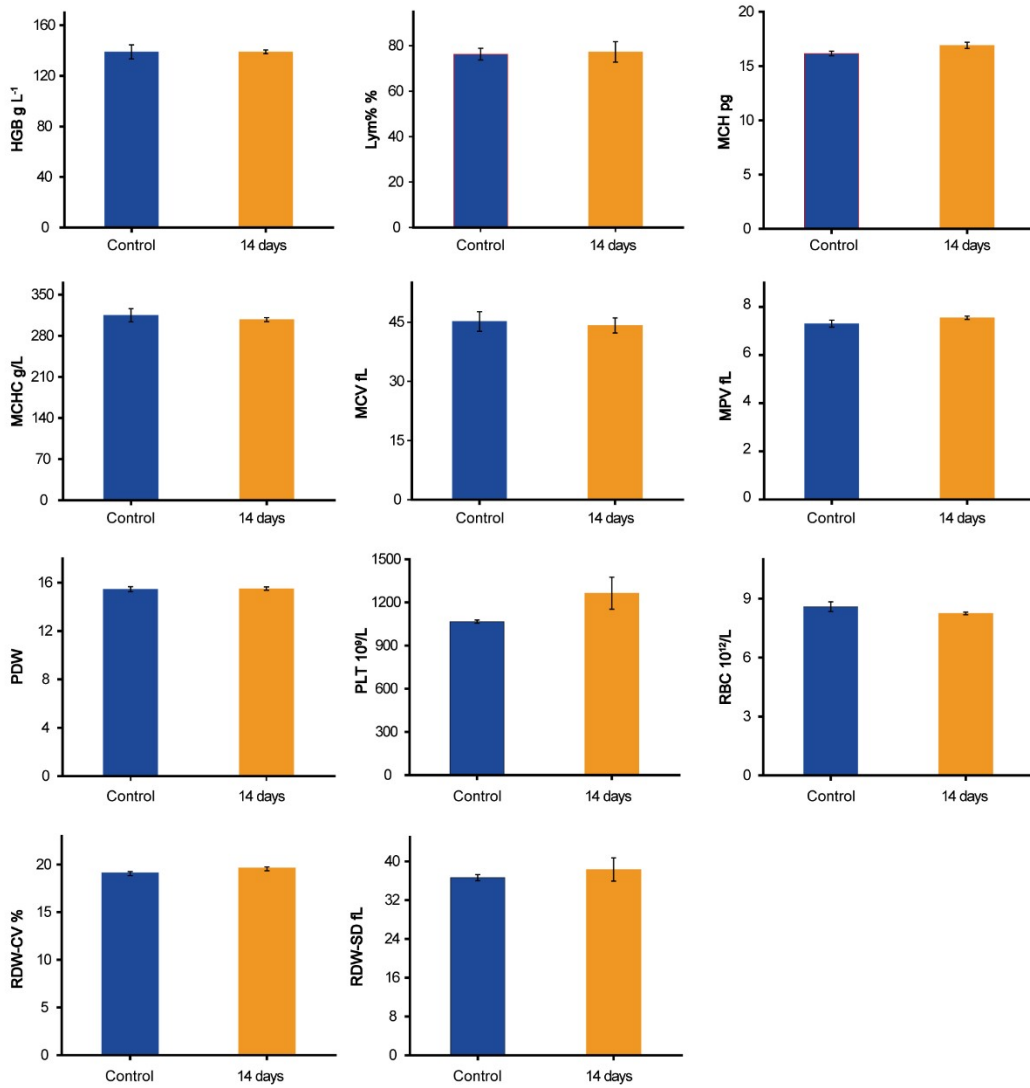

Fig.S10. Blood routine index after 14 days of intravenous injection of BiGd-PVP or PBS (Control).
